# Supplementary material for: Gentle reduction of SBA-15 silica to its silicon replica with retention of morphology
Source: Royal Society of Chemistry journal article supplement (doi:10.1039/c3ra46557h), 2014-01-01
Supplement: c3ra46557h1.pdf [file c3ra46557h1.pdf]

Supplemental Information for:

## **Gentle Reduction of SBA-15 Silica to its Silicon Replica with Retention of Morphology**

*Xiulei Ji,<sup>a†</sup> Guang He,<sup>a</sup> C. Andrei,<sup>b</sup> and Linda F. Nazar<sup>a\*</sup>*

<sup>a</sup> University of Waterloo, Department of Chemistry, Waterloo, Ontario, N2L 3G1, Canada

<sup>b</sup> McMaster University, Department of Chemistry and Canadian Facility for Electron Microscopy, Hamilton, Ontario, L8S 4L8, Canada. Email: lfnazar@uwaterloo.ca

<sup>†</sup> Current address: Department of Chemistry, Oregon State University, Corvallis OR, USA.

### ***Experimental Details***

To prepare the SBA-15, 2 g of Pluronic P123 was dissolved in 60 ml (or 360 ml, for SBA-15 nanorods) of 2 M HCl at 38 °C. Tetraethylorthosilicate (TEOS, 4.2 g) was added into the above solution and vigorously stirred for 6 min. The solution was allowed to stand (quiescent) for 24 hrs at 38 °C, and then it was subsequently heated at 100 °C for another 24 hrs in an autoclave. The SBA-15 was collected by centrifugation, dried, and calcined at 550 °C in air. Nanosized SBA-15 was prepared similarly, but employing a dilute solution of P123 and TEOS in an acidic aqueous medium under static conditions, as reported in reference 20.

Syntheses of Mg<sub>3</sub>Sb<sub>2</sub> and Mg<sub>2</sub>Si intermetallic crystals were carried out by solid state reactions, using a mixture of the elements that were heated as pelletized mixtures under Ar at 610 °C for 5 hrs to form the target compositions. Mg and Sb powder were obtained from VWR, and bulk Si (325 mesh) was obtained from Sigma Aldrich. Stoichiometric Mg with Sb (3:2) or Mg with Si (2:1) were mixed and ground in the glovebox before the power was pressed into a pellet. Residual oxygen in the Ar flow was gettered upstream of the gas flow.

The obtained intermetallics were ground into a fine powder before they were mixed with the SBA-15 samples for the reduction. Typically, a two-fold stoichiometric excess of the intermetallic was mixed with SBA-15 in order to achieve full conversion, and the mixture was

well ground and pressed into a pellet. The reaction mixture pellet was then heated at 800 °C for 5 hrs under an Ar flow. After heating, the product mixture for the reaction between  $\text{Mg}_3\text{Sb}_2$  and  $\text{SiO}_2$  was rinsed in *aqua regia* in order to remove the resulted Sb metal and MgO. The obtained Si replica was filtered and rinsed with water before drying for analysis. The product mixture for the reaction between  $\text{Mg}_2\text{Si}$  and  $\text{SiO}_2$  was soaked and stirred in 1.0 M HCl for 12 hours. In order to separate the bulk silicon from the decomposition of  $\text{Mg}_2\text{Si}$  from the nanosized silicon replica from SBA-15 nanorods, the HCl/Si suspension was sonicated for 6 hrs before the suspension was settled without disturbance for 1 hr. The upper light suspension that contained the nanorod silicon replica was pipetted and collected by centrifuging.

All materials were characterized using XRD, electron microscopy and BET. X-ray diffraction patterns at low ( $0.75$  to  $4^\circ$  in  $2\theta$ ) and wide angle (from  $20$  to  $80^\circ$  in  $2\theta$ ) were collected on a D8-ADVANCE powder X-ray diffractometer operating at 40 kV and 30 mA and employing Cu-K $\alpha$  radiation ( $\lambda = 0.15406$  nm). SEM images were obtained using a LEO 1530 field emission scanning electron microscope. TEM images were collected on a FEI Titan<sup>TM</sup> 80-300 equipped with an aberration corrector of the imaging lens. The  $\text{N}_2$  sorption-desorption isotherms were measured at  $-196$  °C by using a Quantachrome Autosorb Surface Area Analyzer.

---

---

**List of Figures:**

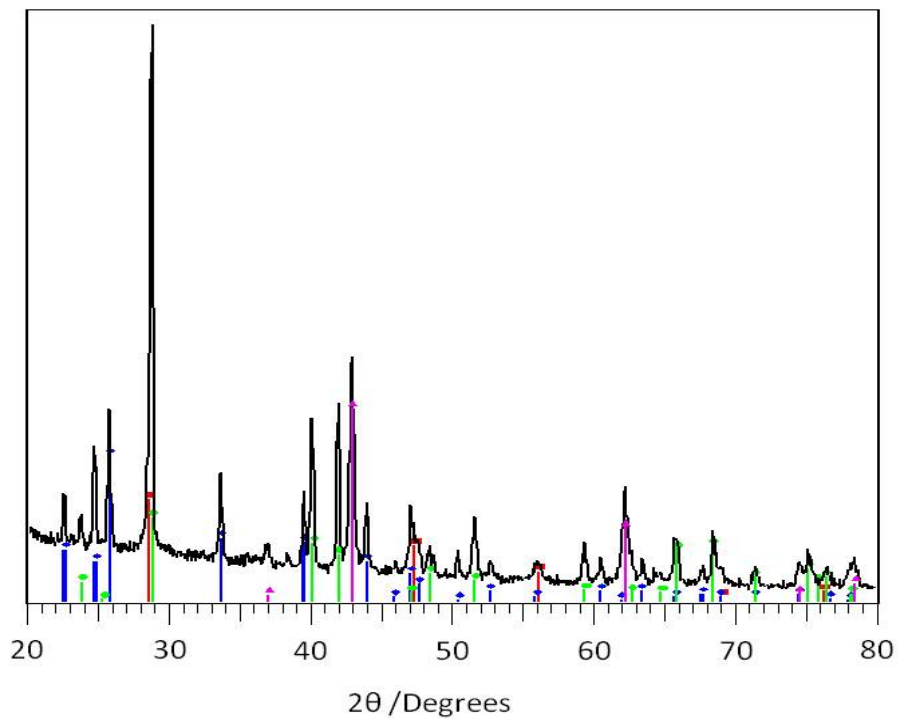

**Figure S1.** XRD pattern of the unwashed reaction product of  $\text{Mg}_3\text{Sb}_2$  and SBA-15. Red marks: Si, blue markers:  $\text{Mg}_3\text{Sb}_2$ , green markers: Sb, purple markers: MgO.

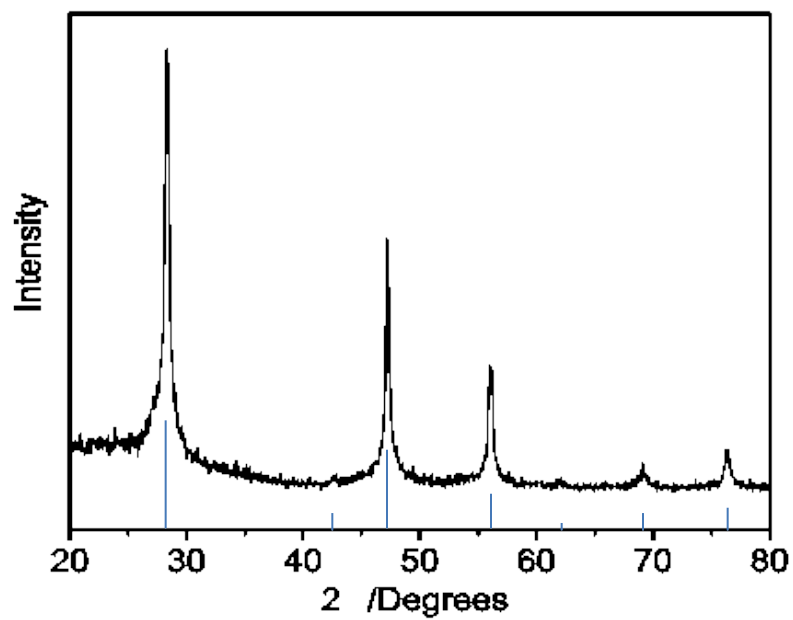

**Figure S2.** Wide angle XRD pattern of Si derived from reaction with  $\text{Mg}_3\text{Sb}_2$  (washed product), showing the characteristic reflections of cubic Si; two contributions are evident in the non-Gaussian lineshapes that arise from nanocrystallites with different coherence lengths.

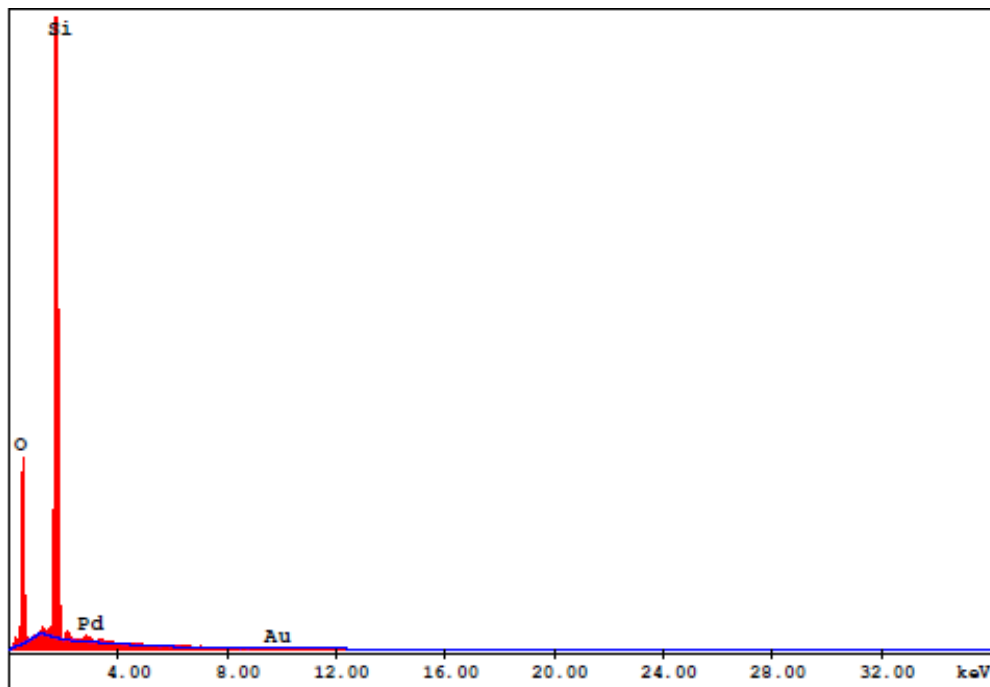

**Figure S3.** EDAX analysis of the nanorod silicon replica shown in Figure 4b (see text), showing a Si: O ratio of 75: 25. The oxide contribution is presumed to arise mostly from surface passivation of the high surface area nano-silicon.

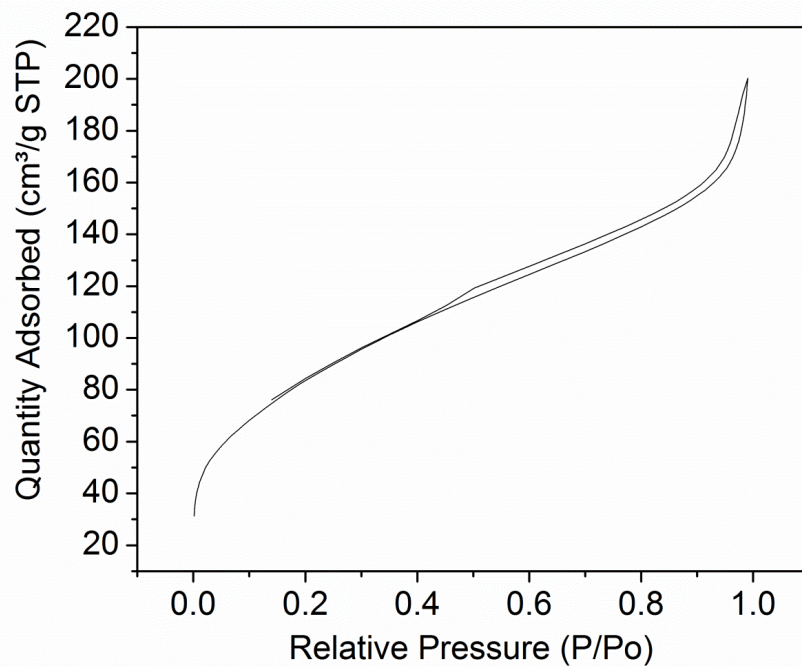

**BET Surface Area Report**  
BET Surface Area:  $308.5981 \pm 1.4882 \text{ m}^2/\text{g}$   
Slope:  $0.013873 \pm 0.000067 \text{ g}/\text{cm}^3 \text{ STP}$   
Y-Intercept:  $0.000233 \pm 0.000010 \text{ g}/\text{cm}^3$   
STP C: 60.499813 Qm: 70.8900  $\text{cm}^3/\text{g}$   
STP Correlation Coefficient: 0.9999178  
Molecular Cross-Sectional Area: 0.1620  $\text{nm}^2$

**Figure S4.** BET isotherm data of Si-MgSi, and BET surface area data.
